# Supplementary material for: Safety and efficacy of romiplostim in splenectomized and nonsplenectomized patients with primary immune thrombocytopenia
Source: PubMed Central journal article supplement — Haematologica. 2017 Apr 14;102(8):1342–51. doi: 10.3324/haematol.2016.161968 (PMC5541869; doi:10.3324/haematol.2016.161968), 2017-08
Supplement: 2016.161968.CINES_SUPPL.pdf [file 2016.161968.CINES_SUPPL.pdf]

## Safety and efficacy of romiplostim in splenectomized and nonsplenectomized patients with primary immune thrombocytopenia

Douglas B. Cines,<sup>1</sup> Jeffrey Wasser,<sup>2</sup> Francesco Rodeghiero,<sup>3,4</sup> Beng H. Chong,<sup>5</sup> Michael Steurer,<sup>6</sup> Drew Provan,<sup>7</sup> Roger Lyons,<sup>8</sup> Jaime Garcia-Chavez,<sup>9</sup> Nancy Carpenter,<sup>10</sup> Xuena Wang<sup>11</sup> and Melissa Eisen<sup>11</sup>

<sup>1</sup>Perelman University of Pennsylvania School of Medicine, Philadelphia, PA, USA; <sup>2</sup>University of Connecticut Health Center, Farmington, CT, USA; <sup>3</sup>Hematology Project Foundation, Vicenza, Italy; <sup>4</sup>San Bortolo Hospital, Vicenza, Italy; <sup>5</sup>St George Hospital/University of New South Wales, Sydney, Australia; <sup>6</sup>Medical University of Innsbruck, Austria; <sup>7</sup>Barts and the London School of Medicine and Dentistry, London, UK; <sup>8</sup>Texas Oncology and US ONCOLOGY Research, San Antonio, TX; <sup>9</sup>Centro Médico Nacional La Raza, Mexico City, Mexico; <sup>10</sup>Amgen Limited, Uxbridge, UK and <sup>11</sup>Amgen Inc., Thousand Oaks, CA, USA

©2017 Ferrata Storti Foundation. This is an open-access paper. doi:10.3324/haematol.2016.161968

Received: December 15, 2016.

Accepted: April 12, 2017.

Pre-published: April 14, 2017.

Correspondence: dcines@mail.med.upenn.edu

---

**Supplementary Table S1.** Infection terms

| Possible opportunistic infection     | Systemic infection        |
|--------------------------------------|---------------------------|
| Candida infection*                   | Bacteremia                |
| <i>Clostridium difficile</i> colitis | Bacterial sepsis          |
| Coccidioidomycosis                   | Fungal sepsis**           |
| Cytomegalovirus infection            | <i>Klebsiella</i> sepsis  |
| Esophageal candidiasis               | Pneumococcal sepsis       |
| Fungal infection*                    | Pseudomonal sepsis**      |
| Fungal sepsis**                      | Sepsis                    |
| Fungal skin infection*               | Septic shock              |
| Genital infection fungal             | Staphylococcal bacteremia |
| Herpes ophthalmic                    | Thrombophlebitis septic   |
| Herpes pharyngitis                   | Urosepsis                 |
| Herpes simplex*                      |                           |
| Herpes virus infection*              |                           |
| Herpes zoster*                       |                           |
| Oral candidiasis                     |                           |
| Oral fungal infection                |                           |
| Oropharyngitis fungal                |                           |
| Pseudomonal sepsis**                 |                           |
| <i>Pseudomonas</i> infection         |                           |
| Urinary tract infection fungal       |                           |
| <i>Varicella</i> *                   |                           |
| Vulvovaginal mycotic infection       |                           |

\*Term was counted as a possible opportunistic infection but could also be a routine infection.

\*\*Term could be a possible opportunistic infection or systemic infection.

Romiplostim in primary ITP by prior splenectomy

**Supplementary Table S2.** Thrombotic events

| n (r)                                 | Nonsplenectomized     |                     | Splenectomized       |                    | All patients           |                      |
|---------------------------------------|-----------------------|---------------------|----------------------|--------------------|------------------------|----------------------|
|                                       | Romiplostim           | Placebo/SOC         | Romiplostim          | Placebo/SOC        | Romiplostim            | Placebo/SOC          |
|                                       | N=655<br>1129.7 pt-yr | N=106<br>97.7 pt-yr | N=391<br>702.0 pt-yr | N=27<br>11.2 pt-yr | N=1046<br>1831.8 pt-yr | N=133<br>108.8 pt-yr |
| Thrombotic event by type              |                       |                     |                      |                    |                        |                      |
| Acute myocardial infarction           | 2 (0.2)               | -                   | 2 (0.3)              | -                  | 4 (0.2)                | -                    |
| Blindness transient                   | 1 (0.1)               | -                   | -                    | -                  | 1 (<0.1)               | -                    |
| Carotid artery occlusion              | -                     | 1 (1.0)             | -                    | -                  | -                      | 1 (0.9)              |
| Cerebrovascular accident              | 6 (0.5)               | -                   | 1 (0.1)              | -                  | 7 (0.4)                | -                    |
| Cerebrovascular disorder              | -                     | 1 (1.0)             | -                    | -                  | -                      | 1 (0.9)              |
| Coronary artery occlusion             | 1 (0.1)               | -                   | -                    | -                  | 1 (<0.1)               | -                    |
| Deep vein thrombosis                  | 9 (0.8)               | 1 (1.0)             | 10 (1.4)             | -                  | 19 (1.0)               | 1 (0.9)              |
| Hemiparesis                           | 1 (0.1)               | -                   | 1 (0.1)              | -                  | 2 (0.1)                | -                    |
| Intestinal infarction                 | -                     | -                   | 1 (0.1)              | -                  | 1 (<0.1)               | -                    |
| Intracranial venous sinus thrombosis  | 1 (0.1)               | -                   | -                    | -                  | 1 (<0.1)               | -                    |
| Ischemic stroke                       | 1 (0.1)               | -                   | 1 (0.1)              | -                  | 2 (0.1)                | -                    |
| Myocardial infarction                 | 6 (0.5)               | -                   | 2 (0.3)              | -                  | 8 (0.4)                | -                    |
| Peripheral arterial occlusive disease | -                     | -                   | 1 (0.1)              | -                  | 1 (<0.1)               | -                    |
| Peripheral embolism                   | 1 (0.1)               | -                   | 1 (0.1)              | -                  | 2 (0.1)                | -                    |
| Portal vein thrombosis                | 2 (0.2)               | -                   | 3 (0.4)              | -                  | 5 (0.3)                | -                    |
| Pulmonary embolism                    | 7 (0.6)               | -                   | 7 (1.0)              | 1 (8.9)            | 14 (0.8)               | 1 (0.9)              |
| Pulmonary thrombosis                  | 2 (0.2)               | -                   | -                    | -                  | 2 (0.1)                | -                    |
| Splenic infarction                    | 1 (0.1)               | -                   | -                    | -                  | 1 (<0.1)               | -                    |

Romiplostim in primary ITP by prior splenectomy

|                                                 |               |               |               |            |               |               |
|-------------------------------------------------|---------------|---------------|---------------|------------|---------------|---------------|
| Thrombophlebitis                                | 5 (0.4)       | -             | 1 (0.1)       | -          | 6 (0.3)       | -             |
| Thrombophlebitis superficial                    | 2 (0.2)       | -             | 3 (0.4)       | -          | 5 (0.3)       | -             |
| Thrombosis                                      | 1 (0.1)       | -             | 3 (0.4)       | -          | 4 (0.2)       | -             |
| Thrombosis in device                            | -             | -             | 1 (0.1)       | -          | 1 (<0.1)      | -             |
| Transient ischemic attack                       | 2 (0.2)       | -             | 3 (0.4)       | -          | 5 (0.3)       | -             |
| Transverse sinus thrombosis                     | -             | -             | 1 (0.1)       | -          | 1 (<0.1)      | -             |
| Venous thrombosis                               | -             | 2 (2.0)       | 1 (0.1)       | -          | 1 (<0.1)      | 2 (1.8)       |
| Venous thrombosis limb                          | 1 (0.1)       | -             | 1 (0.1)       | -          | 2 (0.1)       | -             |
| Last prior platelet count, x10 <sup>9</sup> /L* |               |               |               |            |               |               |
| <20                                             | 4 (0.4)       | 1 (1.0)       | 7 (1.0)       | 1 (8.9)    | 11 (0.6)      | 2 (1.8)       |
| <30                                             | 6 (0.5)       | 1 (1.0)       | 7 (1.0)       | 1 (8.9)    | 13 (0.7)      | 2 (1.8)       |
| <50                                             | 8 (0.7)       | 2 (2.0)       | 10 (1.4)      | 1 (8.9)    | 18 (1.0)      | 3 (2.8)       |
| 50 to <100                                      | 7 (0.6)       | 1 (1.0)       | 7 (1.0)       | -          | 14 (0.8)      | 1 (0.9)       |
| 100 to <200                                     | 20 (1.8)      | -             | 9 (1.3)       | -          | 29 (1.6)      | -             |
| 200 to <400                                     | 14 (1.2)      | 1 (1.0)       | 12 (1.7)      | -          | 26 (1.4)      | 1 (0.9)       |
| ≥400                                            | 3 (0.3)       | 1 (1.0)       | 6 (0.9)       | -          | 9 (0.5)       | 1 (0.9)       |
| Median (Q1, Q3)                                 | 141.5         | 71.0          | 156.0         | 3.0        | 150.0         | 52.5          |
|                                                 | (77.0, 249.0) | (34.0, 376.0) | (75.0, 285.0) | (3.0, 3.0) | (77.0, 260.0) | (10.0, 376.0) |

n: number of events; N: total number of patients; pt-yr: total patient-years on study; Q1: quartile 1; Q3: quartile 3; r: rate per 100 patient-years; SOC: standard of care.

Note: a single patient could have more than one thrombotic event.

\*Platelet count closest to the thrombotic event within the prior 3 months.

Romiplostim in primary ITP by prior splenectomy

**Supplementary Table S3.** Thrombotic events and time over platelet count thresholds

|                                                                 | Nonsplenectomized   |                   | Splenectomized      |                   | All patients        |                   |
|-----------------------------------------------------------------|---------------------|-------------------|---------------------|-------------------|---------------------|-------------------|
|                                                                 | No thrombotic event | Thrombotic event  | No thrombotic event | Thrombotic event  | No thrombotic event | Thrombotic event  |
| Romiplostim                                                     | N=616               | N=39              | N=361               | N=30              | N=977               | N=69              |
| Percentage of time platelet count was $\geq 50 \times 10^9/L$   |                     |                   |                     |                   |                     |                   |
| Mean (SD)                                                       | 74.4 (25.1)         | 71.5 (25.5)       | 59.7 (32.2)         | 67.1 (18.7)       | 69.0 (28.8)         | 69.6 (22.7)       |
| Median (Q1, Q3)                                                 | 83.3 (67.8, 91.7)   | 78.6 (68.2, 90.0) | 72.7 (34.4, 86.1)   | 71.1 (52.0, 78.1) | 80.4 (57.1, 90.1)   | 75.0 (63.0, 87.5) |
| Percentage of time platelets count was $\geq 200 \times 10^9/L$ |                     |                   |                     |                   |                     |                   |
| Mean (SD)                                                       | 19.8 (20.5)         | 15.6 (16.2)       | 20.5 (21.0)         | 22.4 (17.6)       | 20.0 (20.7)         | 18.6 (17.0)       |
| Median (Q1, Q3)                                                 | 13.6 (3.0, 30.9)    | 11.5 (0.0, 27.3)  | 15.6 (0.0, 34.2)    | 22.7 (5.3, 33.3)  | 13.8 (2.1, 32.3)    | 17.4 (0.0, 31.7)  |
| Placebo/SOC                                                     | N=102               | N=4               | N=26                | N=1               | N=128               | N=5               |
| Percentage of time platelet count was $\geq 50 \times 10^9/L$   |                     |                   |                     |                   |                     |                   |
| Mean (SD)                                                       | 33.6 (32.4)         | 40.8 (36.6)       | 9.5 (16.7)          | 11.1 (-)          | 28.6 (31.3)         | 34.9 (34.4)       |
| Median (Q1, Q3)                                                 | 27.3 (0.0, 63.2)    | 39.2 (12.5, 69.2) | 0.0 (0.0, 15.4)     | 11.1 (11.1, 11.1) | 16.7 (0.0, 52.6)    | 25.0 (11.1, 53.3) |
| Percentage of time platelet count was $\geq 200 \times 10^9/L$  |                     |                   |                     |                   |                     |                   |
| Mean (SD)                                                       | 8.2 (16.7)          | 18.8 (37.5)       | 2.2 (6.2)           | 0.0 (-)           | 6.9 (15.3)          | 15.0 (33.5)       |
| Median (Q1, Q3)                                                 | 0.0 (0.0, 8.3)      | 0.0 (0.0, 37.5)   | 0.0 (0.0, 0.0)      | 0.0 (0.0, 0.0)    | 0.0 (0.0, 4.8)      | 0.0 (0.0, 0.0)    |

Q1: quartile 1; Q3: quartile 3; SD: standard deviation; SOC: standard of care.
